# Supplementary material for: Graphene oxide-decorated silver dendrites for high-performance surface-enhanced Raman scattering applications
Source: Royal Society of Chemistry journal article supplement (doi:10.1039/c7tc00381a), 2017-01-01
Supplement: c7tc00381a1.pdf [file c7tc00381a1.pdf]

Electronic Supplementary Information (ESI)

**Graphene oxide-decorated silver dendrites for high-performance  
surface-enhanced Raman scattering applications**

Litao Hu<sup>a,b</sup>, Yan Jun Liu<sup>a,\*</sup>, Yanshun Han<sup>c</sup>, Peixi Chen<sup>b</sup>, Chao Zhang<sup>b</sup>,

Chonghui Li<sup>b</sup>, Zhengyi Lu<sup>b</sup>, Dan Luo<sup>a</sup>, and Shouzhen Jiang<sup>b,\*</sup>,

*<sup>a</sup>Department of Electrical and Electronic Engineering, Southern University of Science  
and Technology, Shenzhen 518055, China*

*<sup>b</sup>School of Physics and Electronics, Shandong Normal University, Jinan 250014,  
China*

*<sup>c</sup>Qilu Institute of Technology, Jinan 250200, China*

Email: yjliu@sustc.edu.cn; jiang\_sz@126.com

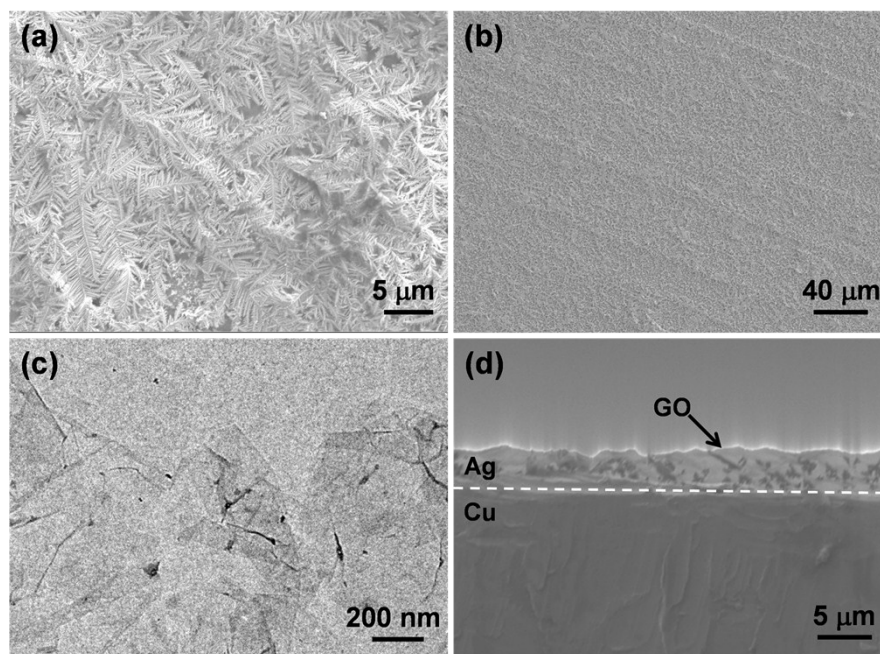

Fig. S1. (a) and (b) Large-area SEM images of GO/AgD/Cu substrate with different magnifications. (c) TEM image of GOs. (d) Cross-sectional SEM image of GO/AgD/Cu substrate.

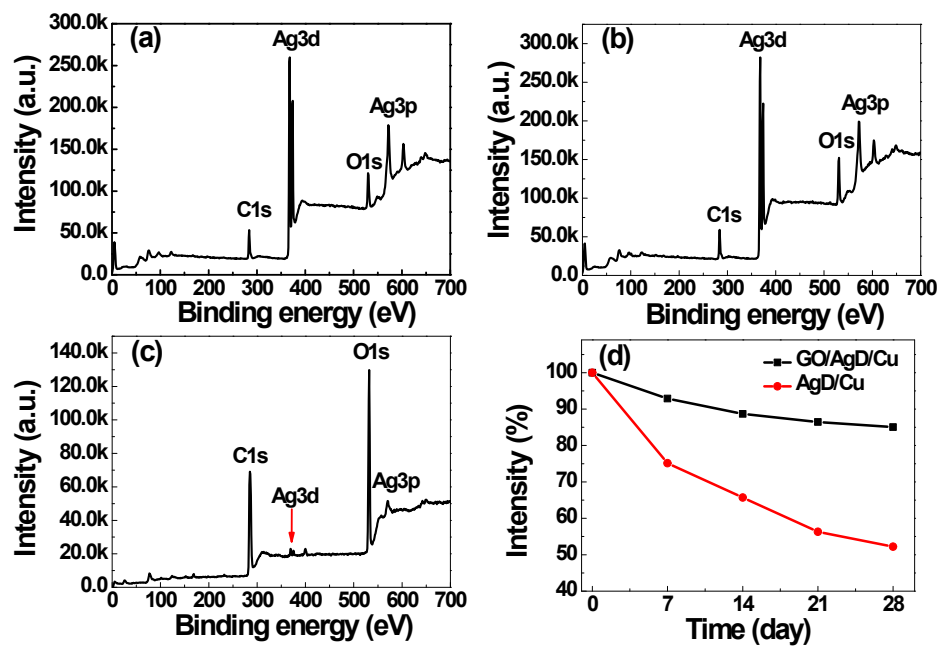

Fig. S2. Measured XPS spectra of the AgD/Cu substrate exposed to ambient air environment for 7 (a) and 30 (b) days, respectively. (c) XPS spectra of the GO/AgD/Cu substrate exposed to ambient air environment for 7 days. (d) Normalized Raman intensity changes as a function of time for the AgD/Cu and GO/AgD/Cu substrates, respectively.
